# Supplementary material for: Circulating Saturated Fatty Acids and Incident Type 2 Diabetes: A Systematic Review and Meta-Analysis
Source: PubMed Central journal article supplement (PMC6566227; doi:10.3390/nu11050998), 2019-05-01
Supplement: nutrients-11-00998-s001.pdf [file nutrients-11-00998-s001.pdf]

**Table S1.** Quality score of included studies for systemic review and meta-analysis.

| Author (year)      | NOS score | Selection                                |                                 |                           |                                                                          | Comparability                                |                                           | Outcome               |                                                   |                                    |
|--------------------|-----------|------------------------------------------|---------------------------------|---------------------------|--------------------------------------------------------------------------|----------------------------------------------|-------------------------------------------|-----------------------|---------------------------------------------------|------------------------------------|
|                    |           | Representativeness of the exposed cohort | Selection of non-exposed cohort | Ascertainment of exposure | Demonstration that outcome of interest was not present at start of study | Study controls for the most important factor | Study controls for any additional factors | Assessment of outcome | Was follow-up long enough for outcomes to occur £ | Adequacy of follow up of cohorts § |
| Hodge (2007)       | 7         | *                                        | *                               | *                         | *                                                                        | *                                            | *                                         | /                     | /                                                 | *                                  |
| Krachler (2008)    | 7         | *                                        | *                               | *                         | *                                                                        | *                                            | /                                         | *                     | /                                                 | *                                  |
| Patel (2010)       | 9         | *                                        | *                               | *                         | *                                                                        | *                                            | *                                         | *                     | *                                                 | *                                  |
| Mozaffarian (2010) | 9         | *                                        | *                               | *                         | *                                                                        | *                                            | *                                         | *                     | *                                                 | *                                  |
| Kröger (2011)      | 9         | *                                        | *                               | *                         | *                                                                        | *                                            | *                                         | *                     | *                                                 | *                                  |
| Mozaffarian (2013) | 8         | *                                        | *                               | *                         | *                                                                        | *                                            | *                                         | *                     | /                                                 | *                                  |
| Zong (2013)        | 8         | *                                        | *                               | *                         | *                                                                        | *                                            | *                                         | *                     | *                                                 | /                                  |
| Santaren (2014)    | 8         | *                                        | *                               | *                         | *                                                                        | *                                            | *                                         | *                     | /                                                 | *                                  |
| Alhazmi (2014)     | 6         | *                                        | *                               | *                         | *                                                                        | *                                            | *                                         | /                     | /                                                 | /                                  |
| Forouhi (2014)     | 9         | *                                        | *                               | *                         | *                                                                        | *                                            | *                                         | *                     | *                                                 | *                                  |
| Lankinen (2015)    | 5         | /                                        | *                               | *                         | *                                                                        | *                                            | /                                         | *                     | /                                                 | /                                  |
| Lemaitre (2015)    | 9         | *                                        | *                               | *                         | *                                                                        | *                                            | *                                         | *                     | *                                                 | *                                  |
| Ma (2015)          | 9         | *                                        | *                               | *                         | *                                                                        | *                                            | *                                         | *                     | *                                                 | *                                  |
| Takkunen (2016)    | 8         | /                                        | *                               | *                         | *                                                                        | *                                            | *                                         | *                     | *                                                 | *                                  |
| Harris (2016)      | 7         | /                                        | *                               | *                         | *                                                                        | *                                            | *                                         | /                     | *                                                 | *                                  |
| Yakoob (2016)      | 7         | /                                        | *                               | *                         | *                                                                        | *                                            | *                                         | /                     | *                                                 | *                                  |
| Akter (2017)       | 7         | /                                        | *                               | *                         | *                                                                        | *                                            | *                                         | *                     | /                                                 | *                                  |
| Lin (2018)         | 8         | *                                        | *                               | *                         | *                                                                        | *                                            | *                                         | *                     | /                                                 | *                                  |
| Lu (2018)          | 9         | *                                        | *                               | *                         | *                                                                        | *                                            | *                                         | *                     | *                                                 | *                                  |

£ Star was given if the study had a minimum follow-up of six years.

§ Star was given if the study had a maximum loss rate of 20%.

**Table S2.** Characteristics of included studies for meta-analysis (Per 1 SD increase).

| Author (year)      | Study, location       | Follow-up (year) | Total N (n cases) | Age (year), Male (%) | Ascertainment of Diabetes                                                      | Individual SFAs                                        | Lipid fraction | Adjustment                                                                                                                                                                                                                                                                          | NOSC score |
|--------------------|-----------------------|------------------|-------------------|----------------------|--------------------------------------------------------------------------------|--------------------------------------------------------|----------------|-------------------------------------------------------------------------------------------------------------------------------------------------------------------------------------------------------------------------------------------------------------------------------------|------------|
| Krachler (2008)    | VIP, Sweden           | 5.4              | 450 (159)         | 40–60, 49            | HbA1c, OGTT                                                                    | C14:0, C15:0, C16:0, C17:0, C18:0                      | EM             | Alcohol intake, BMI, HbA1c.                                                                                                                                                                                                                                                         | 7          |
| Mozaffarian (2010) | CHS, America          | 10               | 3736 (304)        | ≥65, 42              | OGTT, medication                                                               | C15:0, C17:0,                                          | PL             | Age, gender, race, education, enrollment site, smoking, body mass index, waist circumference, coronary heart disease, physical activity, alcohol use, and consumption of carbohydrate, protein, red meat, whole-fat dairy foods, low-fat dairy foods, and total energy.             | 9          |
| Santaren (2014)    | IRAS, America         | 5                | 659 (103)         | 40–60, 45            | OGTT                                                                           | C15:0                                                  | SL             | Age, sex, ethnicity, center, physical activity, smoking status, alcohol intake, education, and total energy, fruit and vegetable, red meat, soft drink and fiber intakes.                                                                                                           | 8          |
| Forouhi (2014)     | EPIC-InterAct, Europe | 11.7             | 27,296 (12,132)   | 53.7(mean), 38       | Self-reported, care registers, hospital admissions, mortality data, medication | C14:0, C15:0, C16:0, C17:0, C18:0, C20:0, C22:0, C24:0 | PL             | Age, center, sex, physical activity, smoking status, and education level, total energy intake, alcohol intake, and BMI.                                                                                                                                                             | 9          |
| Alhazmi (2014)     | HCS, Australia        | 5                | 187 (37)          | 55–85, 51            | Self-reported                                                                  | C16:0, C18:0, C24:0                                    | WB             | Age and gender, BMI; physical activity; alcohol intake; smoking; supplement use, carbohydrate, fiber, and protein.                                                                                                                                                                  | 6          |
| Lankinen (2015)    | METSIM, Finland       | 5.9              | 1302 (71)         | 45–68, 100           | OGTT, HbA1c                                                                    | C14:0, C15:0, C16:0, C17:0, C18:0, C20:0, C22:0, C24:0 | PL             | Age, BMI, smoking, physical activity and fasting glucose at baseline.                                                                                                                                                                                                               | 5          |
| Takkunen (2016)    | FDPS, Finland         | 11               | 383 (155)         | 40–65, 33            | OGTT                                                                           | C14:0, C15:0, C16:0, C18:0                             | SL             | Age, sex, study group, smoking, alcohol intake, waist circumference and physical activity at leisure time, study centers, fiber intake, carbohydrate intake, energy intake and serum triglyceride concentration, concentrations of plasma fasting and 2-h glucose.                  | 8          |
| Harris (2016)      | WHIMS, America        | 11               | 6379 (703)        | 65–80, 0             | Self-reported                                                                  | C14:0, C16:0, C20:0, C22:0, C24:0                      | EM             | Age, race, waist circumference, highest education, current smoking status, physical activity, weekly alcohol intake, glycemic load, and family history of diabetes.                                                                                                                 | 7          |
| Lin (2018)         | GNHS, China           | 5.6              | 2683 (216)        | 40–75, 33            | Fasting glucose, HbA1c, medications                                            | C14:0, C16:0, C18:0, C20:0, C22:0, C24:0               | EM             | Sex, BMI, WHR, smoking status, alcohol drinking, tea drinking, education level, household income, physical activity, family history of diabetes, total energy intake, low-density lipoprotein cholesterol, high-density lipoprotein cholesterol, triglycerides and fasting glucose. | 8          |
| Lu (2018)          | SCHS, Singapore       | 6                | 320 (160)         | 60–70, 49            | HbA1c                                                                          | C14:0, C16:0, C18:0                                    | SL             | BMI, history of hypertension, smoking, physical activity, fasting status, triglycerides, HDL-cholesterol, random glucose and HbA1c levels.                                                                                                                                          | 8          |

Abbreviations: VIP: Vasterbotten Intervention Programme; CHS: Cardiovascular Health Study; IRAS: The Insulin Resistance Atherosclerosis Study; EPIC: European Prospective Investigation into Cancer and nutrition; HCS: Hunter Community Study; METSIM: metabolic syndrome in men; FDPS: Finnish Diabetes Prevention Study; WHIMS: Women's Health Initiative Memory Study; GNHS:

Guangzhou Nutrition and Health Study; SCHS: Singapore Chinese Health School; L: plasma phospholipid; EM: Erythrocyte membranes; SL: serum lipids; WB: whole blood; BMI: Body Mass Index; WHR: waist-to-hip ratio; HDL: high density lipoprotein; HbA1c: glycated hemoglobin; OGTT: oral glucose tolerance test; NOSC: Newcastle–Ottawa Scale Criteria; SD: standard deviation.
